# Supplementary material
Source: publisher site journal article supplement (https://www.dovepress.com/article/215055)
Supplement: Supplementary file 1 [file get_supplementary_file.php]

**Supplementary materials**


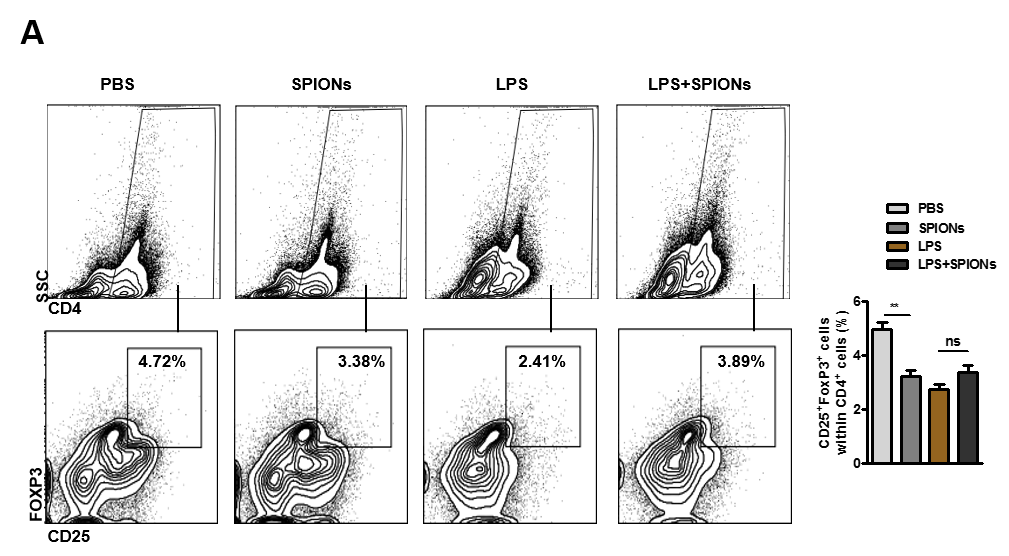


**Figure S1. Ferumoxytol does not affect the change of the population of Treg in septic mice.** (A)Flow cytometry data of hepatic cells stained with antibodiesto CD4, CD25 and Foxp3+are presented. The proportion of macrophages is presented. Data with error bars are represented as mean ±SD. Each panel is a representative experiment of at least three independent biological replicates. **p* < 0.05, ***p* < 0.01, ****p* < 0.001 as determined by unpaired Student’s t-test.


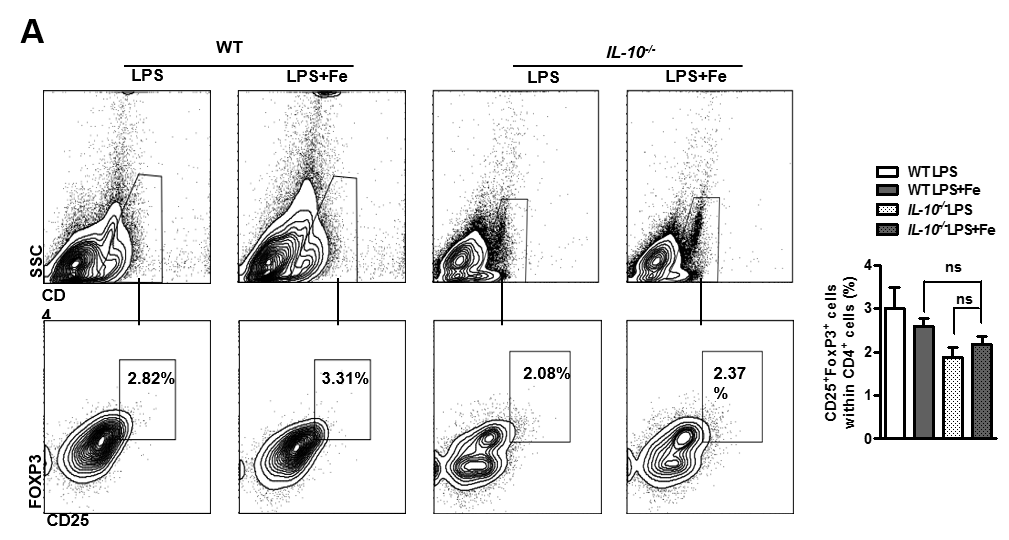


**Figure S2. Ferumoxytol has no influence on the population of Treg cells in IL-10-/-septic mice.** (A) Flow cytometry data of hepatic cells stained with antibodiesto CD4, CD25 and Foxp3are presented. The proportion of macrophages is presented. Data with error bars are represented as mean ± SD. Each panel is a representative experiment of at least three independent biological replicates. **p* < 0.05, ***p* < 0.01, ****p* < 0.001 as determined by unpaired Student’s t-test.


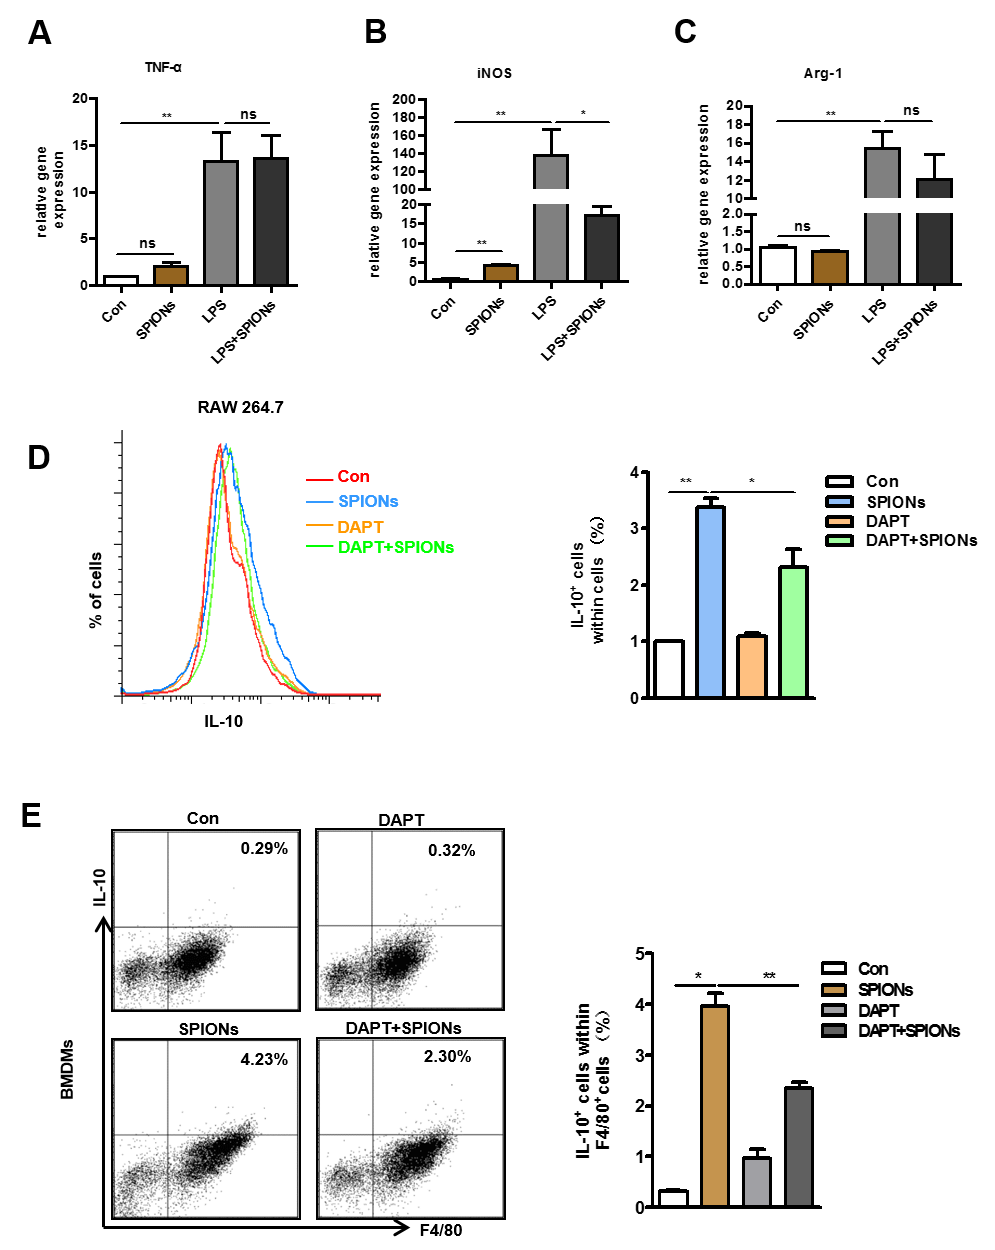


**Figure S3.** **Ferumoxytol affects macrophage inflammatory response.** (A-C) mRNA expressions of *TNF-a, iNOS and Arg-1* in RAW 264.7 cells were pre-treated with the LPS (100 ng/ml), respectively for 2h and unstimulated or stimulated with 200µg/ml Ferumoxytol for 24 h. (D-E) The percentage of IL-10+ cells in RAW 264.7 cells and BMDMs were pre-treated with the DAPT (10 µM), respectively for 2 h and unstimulated or stimulated with 200 µg/ml Ferumoxytol for 24 h was determined by flow cytometry. Data with error bars are represented as mean ± SD. Each panel is a representative experiment of at least three independent biological replicates. **p* < 0.05, ***p* < 0.01, ****p* < 0.001 as determined by unpaired Student’s t-test.


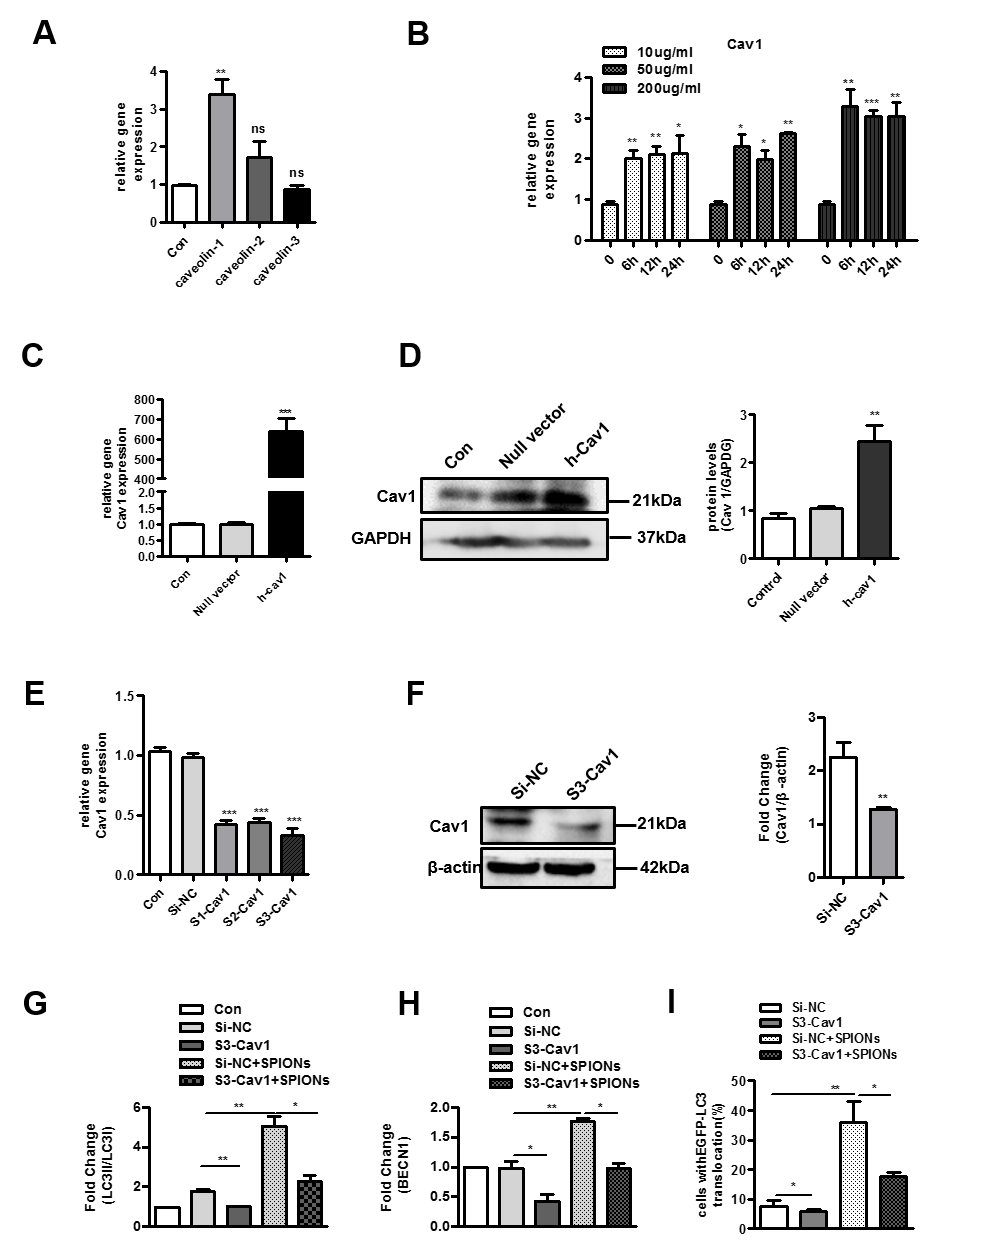


**Figure S4.** **Ferumoxytol upregulates the expression level of Cav-1 and the effects of high-doses and si-RNA of Cav1 in macrophages.** (A) mRNA expressions of *Cav1*, *Cav2* or *Cav3* in RAW 264.7 cells were pre-treated with Ferumoxytol for 24 h. (B) mRNA expressions of *Cav1* in RAW 264.7 cells were 10 ug/ mL, 50 μg/mL and 200 μg/mL of Ferumoxytolfor 6 h, 12 h and 24 h, respectively. (C-D) RAW 264.7 cells were transfected with siNC or siCav1. The cells were harvested at 48 h after transfection. *Cav1* mRNA level expression was determined by qPCR. *Cav1* protein level was determined after transfection for 48 h by western blot and normalized to GAPDH. (E-F) RAW 264.7 cells were transfected with Cav1 plasmid. The cells were harvested at 48 h after transfection. *Cav1* mRNA level expression was determined by qPCR. *Cav1* protein level was determined after transfection for 48 h by western blot and normalized to β-actin. (G-H) Relative Beclin-1and LC3B levels were determined by densitometry and normalized to each GAPDH protein levels. (I) LC3II punctas were observed by a confocal microscopy, number of autophagosomes was quantified. Data with error bars are represented as mean ± SD. Each panel is a representative experiment of at least three independent biological replicates. **p* < 0.05, ***p* < 0.01, ****p* < 0.001 as determined by unpaired Student’s t-test.


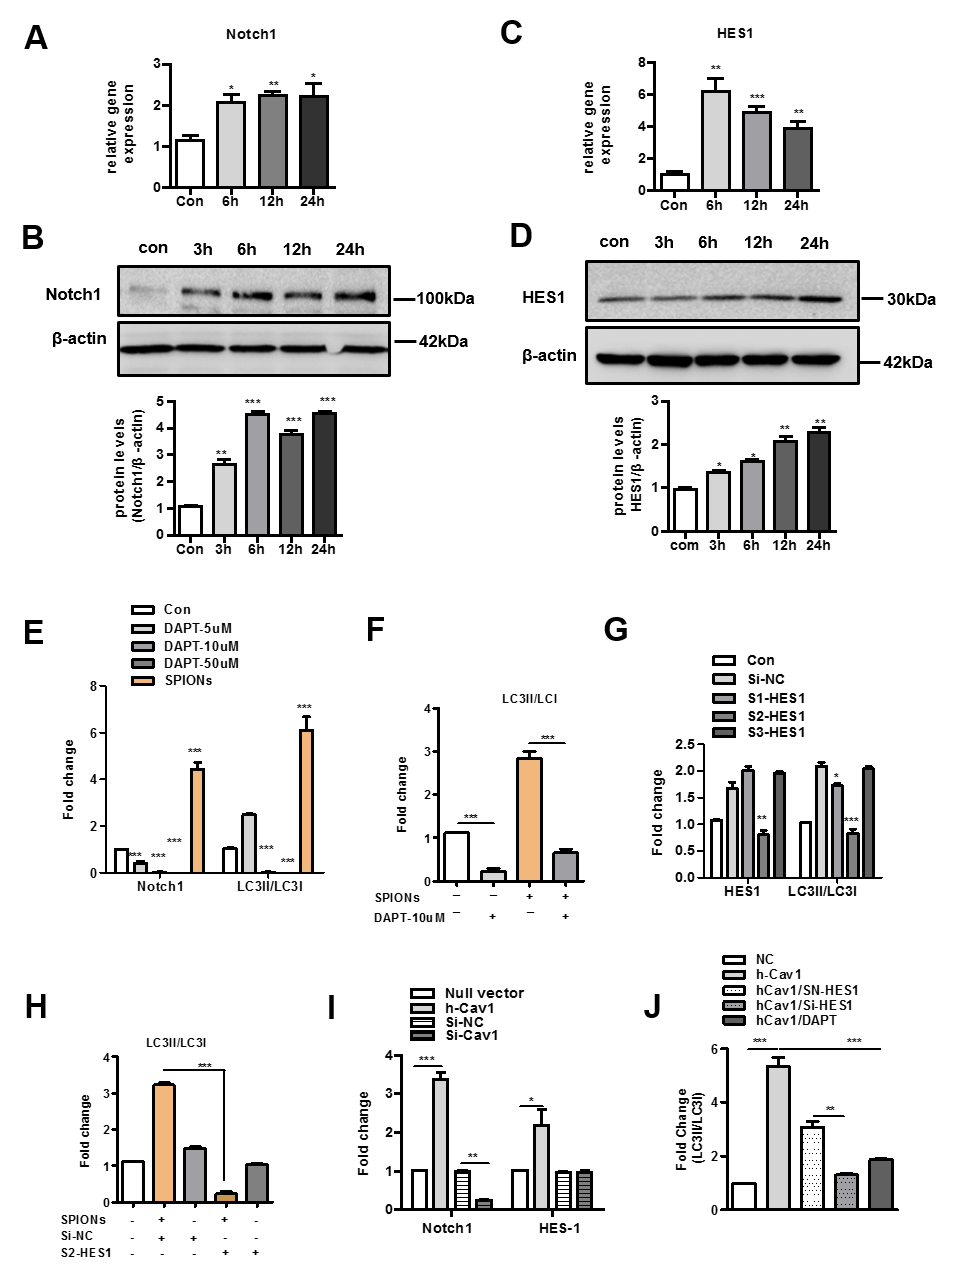


**Figure S5.** **Ferumoxytol activates the Notch1/HES1 signal pathway in macrophages.**  (A-D) mRNA expressions of *Notch1* and *HES1* in RAW 264.7 cells were pre-treated with Ferumoxytol for 6h, 12h and 24h. Notch1 and HES1protein level was determined after transfection for 3 h, 6h, 12 h and 24 h by western blot and normalized to β-actin. (E) Noch1 and LC3B protein level normalized to β-actin. (F) LC3B protein level normalized to β-actin. (G) HES1 and LC3B protein level normalized to β-actin. (H) LC3B protein level normalized to β-actin. (I) Noch1 and HES1 protein level normalized to β-actin. (J) LC3B protein level normalized to GAPDH. Data with error bars are represented as mean ± SD. Each panel is a representative experiment of at least three independent biological replicates. **p* < 0.05, ***p* < 0.01, ****p* < 0.001 as determined by unpaired Student’s t-test.

**Table S1 Primers used for real-time quantitative PCR analysis**

| Gene | Forward | Reverse |
| --- | --- | --- |
| Mouse TNF-α | CCCTCACACTCAGATCATC | GCTACGACGTGGGCTACG |
| Mouse IL-10 | GCTCTTACTGACTGGCATGAG | CGCAGCTCTAGGAGCATGTG |
| Mouse iNOS | CCAAGCCCTCACCTACTTCCR | GGCAGTGTAACTCTTCTGCAT |
| Mouse Arg-1 | CTCCAAGCCAAAGTCCTTAGAG | AGGAGCTGTCATTAGGGACATC |
| MouseCaveolin1 | ATGTCTGGGGGCAAATACGTG | CGCGTCATACACTTGCTTCT |
| MouseCaveolin2 | CCACAGTGGCGTTGACTAC | AGATGAGAGTTGAGCTGGTGA |
| MouseCaveolin3 | TCTGGAAGCTCGGATCATCAA | TCCGCAATCACGTCTTCAAAAT |
| MouseNotch1 | GATGGCCTCAATGGGTACAAG | TCGTTGTTGTTGATGTCACAGT |
| Mouse Notch2 | GAGAAAAACCGCTGTCAGAATGG | :GGTGGAGTATTGGCAGTCCTC |
| Mouse Notch3 | AGTGCCGATCTGGTACAACTT | AGTGCCGATCTGGTACAACTT |
| Mouse Notch4 | GAACGCGACATCAACGAGTG | GGAACCCAAGGTGTTATGGCA |
| Mouse HES1 | GAGCACAGAAAGTCATCAAAGCC | TCTCTAGCTTGGAATGCCGG |
| Mouse HES5 | AGTCCCAAGGAGAAAAACCGA | GCTGTGTTTCAGGTAGCTGAC |
| Mouse HEY1 | AATGGAAACTTGAGTTCGGCG | TGTTATTGATTCGGTCTCGTCG |
| MouseGAPDH | GGTGAAGGTCGGTGTGAACG | CTCGCTCCTGGAAGATGGTG |
